# Supplementary material for: Comparative gene expression profiling between optic nerve and spinal cord injury in Xenopus laevis reveals a core set of genes inherent in successful regeneration of vertebrate central nervous system axons
Source: PubMed Central journal article supplement (PMC7430912; doi:10.1186/s12864-020-06954-8), 2020-08-05

**Additional\_File5\_PCA\_Scatterplot.pdf.** Scatterplot representation of the Principal Component Analyses (PCA) of gene expression profiles. Ellipses group biological replicates for each indicated condition (experimentals, solid squares; controls, empty squares), indicating variation among samples. **A–C**, PCA of tadpole and juvenile hindbrain after spinal cord injury (SCI), and of juvenile frog after optic nerve crush (ONC), respectively. In **C**, expression profiles from the operated eye were compared with those of the contralateral, unoperated eyes within the same animals. **D**, PCA of all 17 conditions combined, supporting the tissue-specific nature of gene expression profiles. Conditions were the same as in **A–C**, except that data from eyes of animals receiving no injury was included (open triangles, Frog Eye, Unop). **E**, PCA of tadpole and juvenile frog hindbrain samples after spinal cord injury, supporting the conclusion that the differences in gene expression profiles between the time points at which numbers of differentially expressed genes reached their peaks (3 days in juvenile frog hindbrain and 1 week in tadpole hindbrain) were more than just a kinetic difference in the timing of expression of the same differentially expressed genes. Abbreviations: ONC, optic nerve crush; PC1, principal component axis 1; PC2, Principal Component axis 2; SCI, spinal cord injured; TX, spinal cord transected; Unop ONC – unoperated eye, contralateral to the operated eye; Frog Eye, Unop – eyes from unoperated animals; wk, week.

A. Tadpole Hindbrain SCI

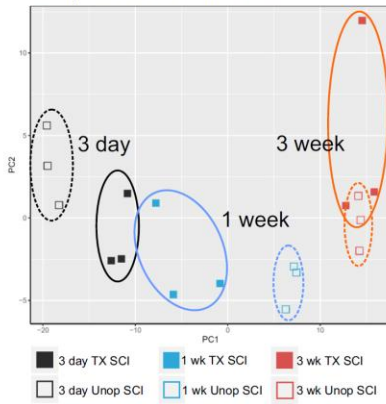

B. Juvenile Frog Hindbrain SCI

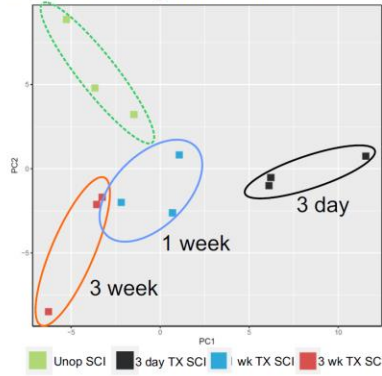

C. Juvenile Frog Eye ONC

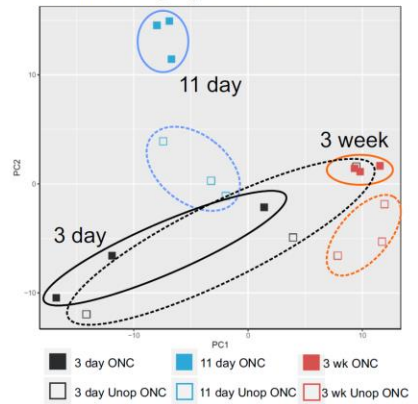

D. All Conditions Combined

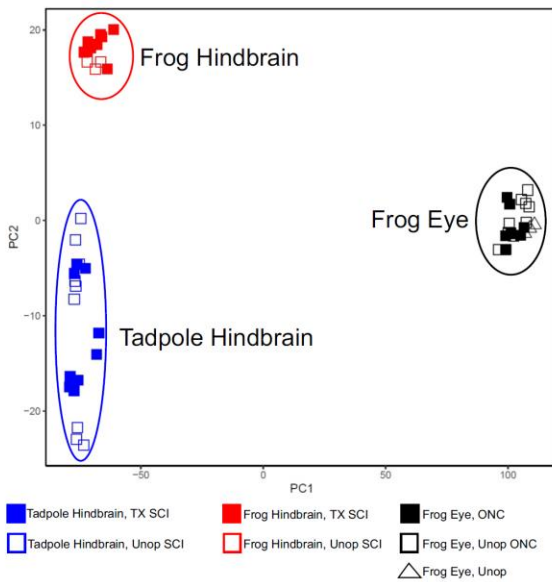

E. SCI, Tadpole & Juvenile Frog Hindbrain Combined

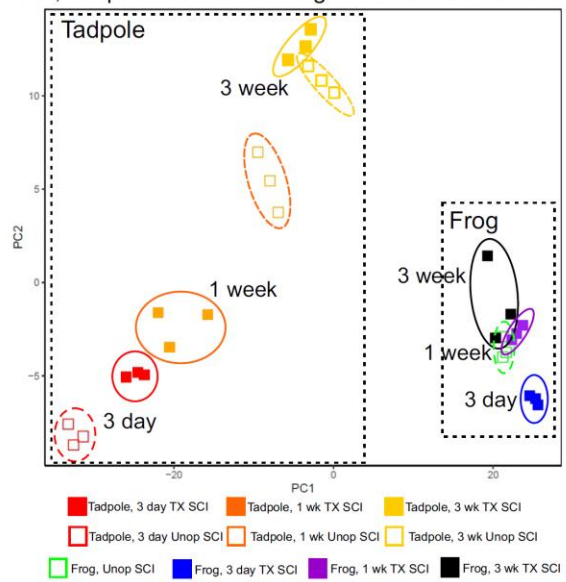

Supplement: 12864_2020_6954_MOESM5_ESM.pdf [file 12864_2020_6954_MOESM5_ESM.pdf]
